# Supplementary material
Source: PubMed Central journal article supplement (PMC4445366)
Supplement: NIHMS118015-supplement-01.pdf [file NIHMS118015-supplement-01.pdf]

**Supplemental Figure 1.** Combination of results of in vivo mice experiments with three additional replicated experiments of nifurtimox and control conditions in a randomized block design analysis of variance confirmed the significance of the tumor weight differences ( $F(1,3) = 31.90, p = 0.011$ ).

---

**Supplemental Figure 1:** Tumor Weights (g) for Control and Nifurtimox Conditions for Four Replicated Experiments

| Replicate Number | Control mean $\pm$ sd<br>( n ) | Nifurtimox mean $\pm$ sd<br>( n ) |
|------------------|--------------------------------|-----------------------------------|
| 1                | 1.14 $\pm$ 0.59<br>( 5 )       | 0.30 $\pm$ 0.17<br>( 6 )          |
| 2                | 1.28 $\pm$ 1.14<br>( 7 )       | 0.04 $\pm$ 0.05<br>( 8 )          |
| 3                | 1.30 $\pm$ 1.05<br>( 8 )       | 0.78 $\pm$ 0.75<br>( 8 )          |
| 4                | 2.50 $\pm$ 1.32<br>( 8 )       | 1.49 $\pm$ 1.57<br>( 7 )          |

Differences between replicates  $F(3,3) = 15.24$  ( $p = 0.026$ )

Differences between conditions  $F(1,3) = 31.90$  ( $p = 0.011$ )

Randomized Block Design Analysis of Variance Table

| Source                     | Sum-of-Squares | df | Mean-Square | F-Ratio | p-value |
|----------------------------|----------------|----|-------------|---------|---------|
| Replicate                  | 16.365         | 3  | 5.455       | 15.24   | 0.026   |
| Conditions                 | 11.419         | 1  | 11.419      | 31.90   | 0.011   |
| Replicate by<br>Conditions | 1.073          | 3  | 0.358       | 0.364   | 0.779   |
| Error                      | 48.203         | 49 | 0.984       |         |         |
